# Supplementary figures and images for: The improved photocatalytic activity of highly expanded MoS2 under visible light emitting diodes
Source: Royal Society of Chemistry journal article supplement (doi:10.1039/d0na00936a), 2020-12-28

**Supplementary Materials**

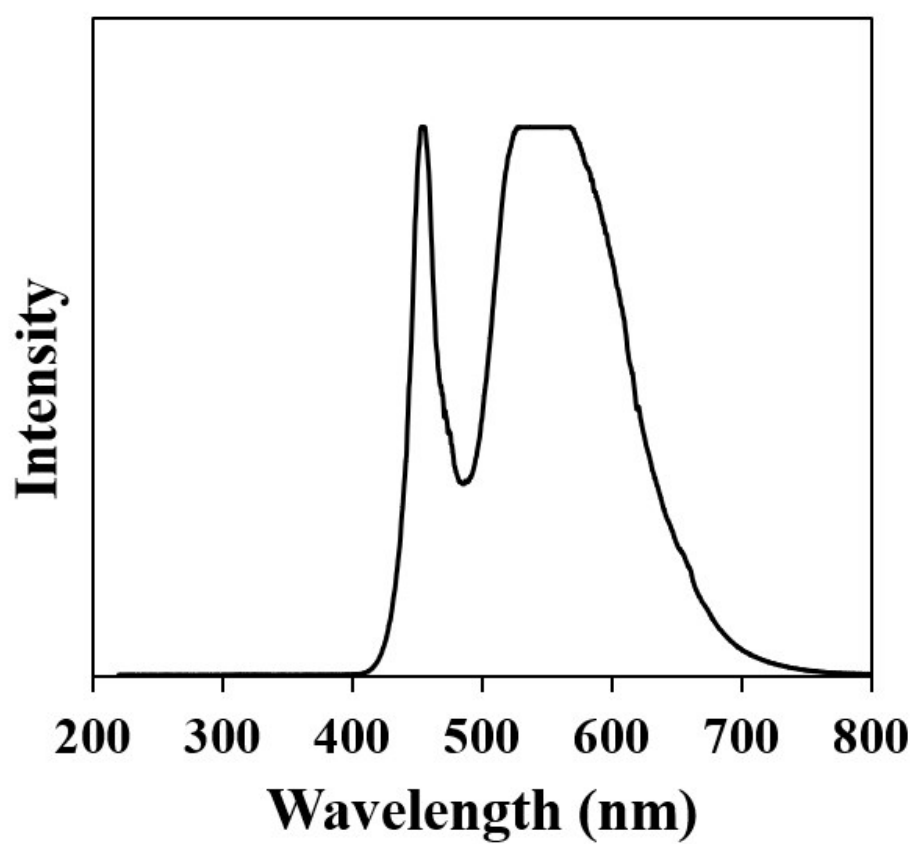

Fig. S1: Spectrum of LED used in photocatalytic system

Supplement: d0na00936a1.pdf [file d0na00936a1.pdf]
